# Supplementary material for: Update on the GOSAT TANSO–FTS SWIR Level 2 retrieval algorithm
Source: Copernicus journal article supplement (doi:10.5194/amt-16-1477-2023), 2023-03-22
Supplement: Supplementary file 1 [file amt-16-1477-2023-supplement.pdf]

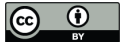

*Supplement of*

## **Update on the GOSAT TANSO–FTS SWIR Level 2 retrieval algorithm**

**Yu Someya et al.**

*Correspondence to:* Yu Someya (someya.yu@nies.go.jp)

The copyright of individual parts of the supplement might differ from the article licence.

# 1 Difference in the solar irradiance spectra

The solar irradiance spectra used in the V02 and V03 are compared in the following figure. The blue and red lines are for V02 and V03 and the differences in those are depicted below.

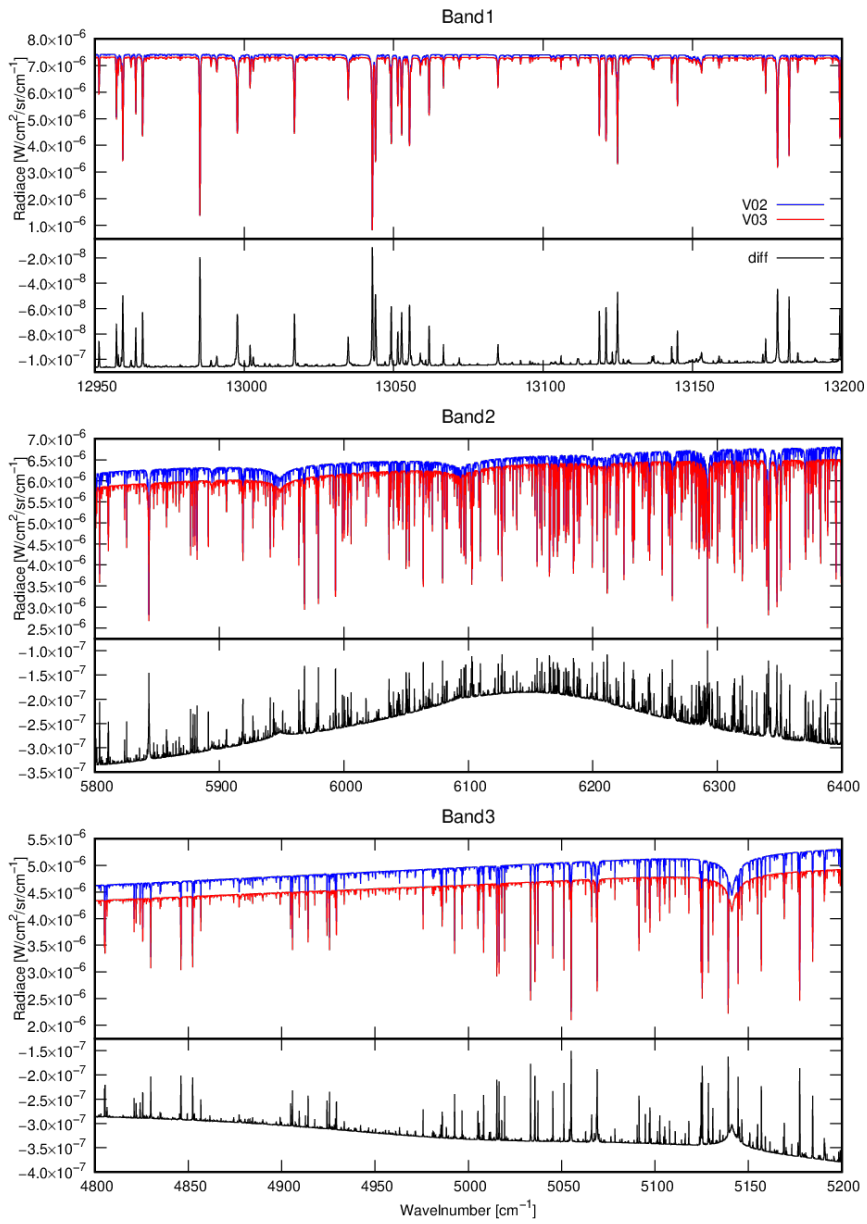

Fig. S1: Solar irradiance spectra used in V02 (blue) and V03 (red) algorithms.

## 2 Comparison of the spectral residuals

The averaged and normalized spectral residuals from V02.90/91 and V03.00 obtained in April 2020 are shown in the same figure as Fig. S2 and S3. In addition, the specific spectral ranges over land are shown in Fig. S4.

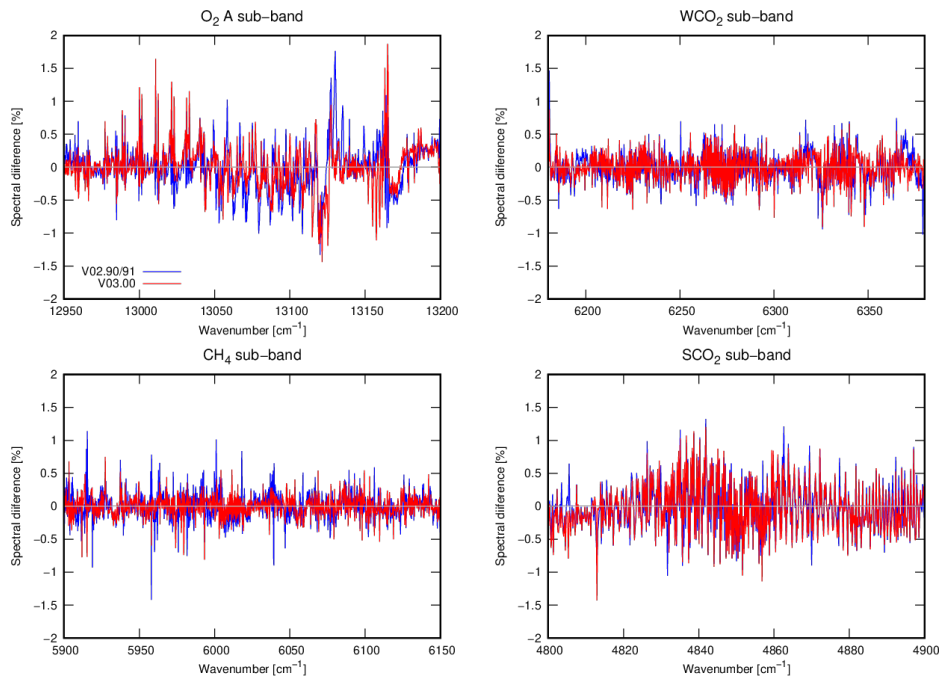

**Fig. S2:** Averaged and normalized spectral residuals over land obtained in April 2022 from V02.90/91 (blue) and V03.00 (red) for each sub-band.

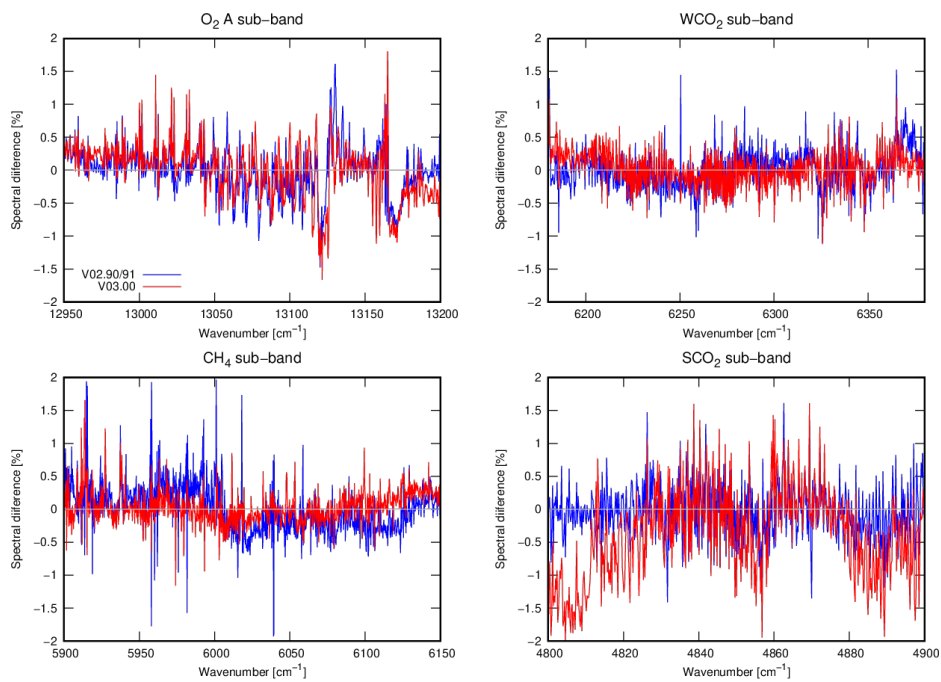

**Fig. S3:** Same as Fig. S2 but for over the ocean.

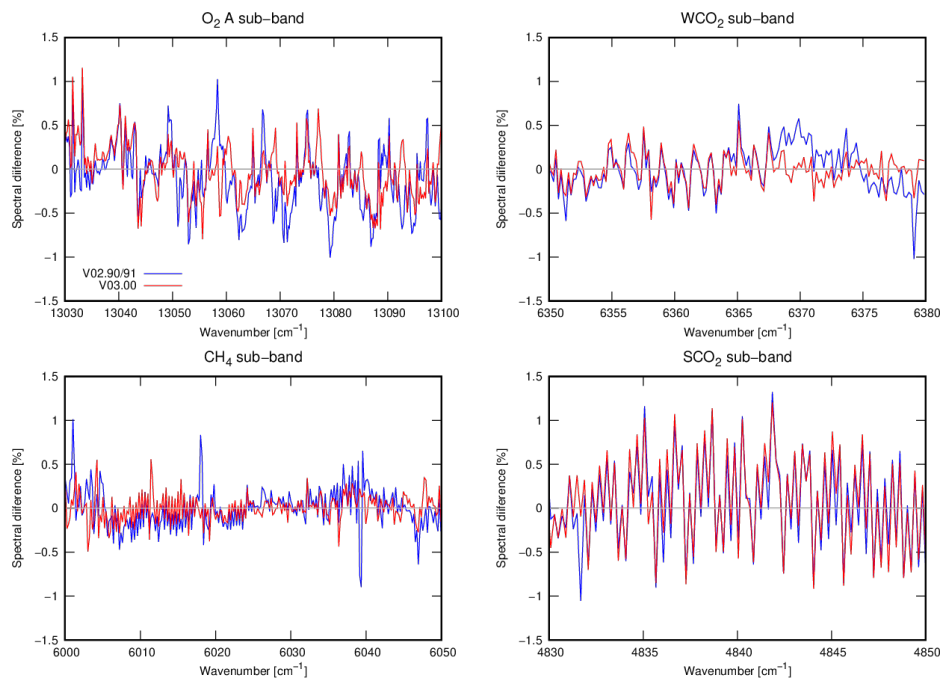

**Fig. S4:** Same as Fig. S2 but the specific spectral ranges are zoomed in.

### 3 Correlation between the changes in Xgas and Ps

Correlations between the changes in the retrieved surface pressure and those in Xgas from both versions are shown in Fig. S5. Significant correlations are seen for XCO<sub>2</sub> over land and XCH<sub>4</sub> over both surfaces.

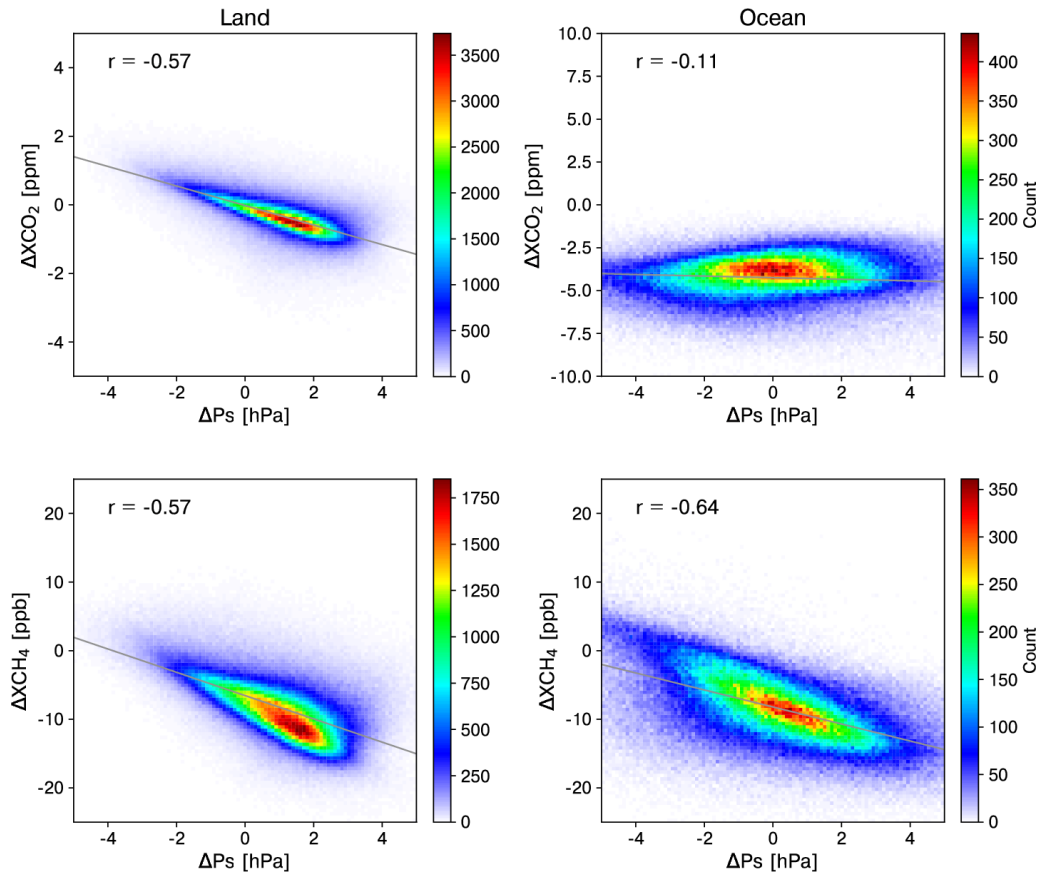

**Fig. S5** Correlations between the changes in the retrieved surface pressure and those in Xgas from V02.90/91 and V03.00 over land and over the ocean.

## 4 Comparison results for the individual TCCON sites

The validation results of V02.90/91 and V03.00 against the individual TCCON measurements are shown below. The version of TCCON data is GGG2020. The match-up condition is  $\pm 2^\circ$  horizontally and  $\pm 30$  min temporally. The sum of N for the individual sites and N for the total can be inconsistent because the total results contain only the nearest TCCON site data for each GOSAT observation.

**Table S1:** Validation results for V02.90/91 over land with gain H

| V02.90/91 (Land/H)      | XCO <sub>2</sub> |            |          | XCH <sub>4</sub> |            |          |
|-------------------------|------------------|------------|----------|------------------|------------|----------|
| Site                    | N                | Bias (ppm) | SD (ppm) | N                | Bias (ppb) | SD (ppb) |
| Bremen (br)             | 45               | 0.21       | 2.16     | 45               | 11.38      | 9.93     |
| Burgos (bu)             | 33               | 0.85       | 2.71     | 33               | 13.57      | 10.97    |
| Caltech (Pasadena) (ci) | 2240             | -0.90      | 1.83     | 2240             | 2.02       | 10.65    |
| East Trout Lake (et)    | 4                | -2.78      | 2.24     | 4                | -1.53      | 10.13    |
| Fourcorners (fc)        | 17               | -0.45      | 1.76     | 17               | 2.04       | 13.62    |
| Indianapolis (if)       | 34               | -0.03      | 1.91     | 34               | 5.78       | 10.82    |
| Izana (iz)              | 0                |            |          | 0                |            |          |
| JPL01 (jc)              | 0                |            |          | 0                |            |          |
| JPL02 (jf)              | 753              | -0.39      | 1.92     | 753              | 3.02       | 11.65    |
| Karlsruhe (ka)          | 222              | 0.03       | 2.41     | 222              | 3.71       | 12.26    |
| Lauder01 (lh)           | 5                | -0.82      | 1.91     | 5                | 12.93      | 3.49     |
| Lauder02 (ll)           | 221              | -1.46      | 2.00     | 226              | -0.57      | 11.24    |
| Lauder03 (lr)           | 147              | -2.18      | 1.67     | 149              | -5.07      | 10.28    |
| Lamont (oc)             | 1397             | -1.22      | 1.70     | 1397             | 0.93       | 12.17    |
| Manaus (ma)             | 0                |            |          | 0                |            |          |
| Nicosia (ni)            | 0                |            |          | 0                |            |          |
| Ny-Alesund (ny)         | 0                |            |          | 0                |            |          |
| Park Falls (pa)         | 230              | -0.77      | 2.16     | 230              | 8.83       | 10.80    |
| Paris (pr)              | 241              | -0.95      | 2.12     | 241              | -0.01      | 11.30    |
| Reunion (ra)            | 0                |            |          | 0                |            |          |
| Rikubetsu (rj)          | 119              | -0.02      | 2.07     | 119              | 8.79       | 10.59    |
| Saga (js)               | 332              | 1.38       | 2.30     | 332              | 12.22      | 10.93    |
| Sodankyla (so)          | 51               | -0.21      | 1.91     | 52               | 5.75       | 10.80    |
| Tsukuba (tk)            | 859              | 0.57       | 2.11     | 859              | 4.30       | 10.91    |
| Xianghe (xh)            | 598              | 0.02       | 2.50     | 598              | 4.76       | 14.33    |
| Total                   | 7357             | -0.56      | 2.13     | 7365             | 2.97       | 11.94    |

**Table S2** Validation results for V02.90/91 over land with gain M

| V02.90/91 (Land/M)      | XCO <sub>2</sub> |            |          | XCH <sub>4</sub> |            |          |
|-------------------------|------------------|------------|----------|------------------|------------|----------|
|                         | N                | Bias (ppm) | SD (ppm) | N                | Bias (ppb) | SD (ppb) |
| Bremen (br)             | 0                |            |          | 0                |            |          |
| Burgos (bu)             | 0                |            |          | 0                |            |          |
| Caltech (Pasadena) (ci) | 1256             | -0.78      | 1.88     | 1256             | 8.51       | 19.09    |
| East Trout Lake (et)    | 0                |            |          | 0                |            |          |
| Fourcorners (fc)        | 0                |            |          | 0                |            |          |
| Indianapolis (if)       | 0                |            |          | 0                |            |          |
| Izana (iz)              | 0                |            |          | 0                |            |          |
| JPL01 (jc)              | 0                |            |          | 0                |            |          |
| JPL02 (jf)              | 195              | -1.16      | 1.92     | 195              | 5.68       | 18.56    |
| Karlsruhe (ka)          | 0                |            |          | 0                |            |          |
| Lauder01 (lh)           | 0                |            |          | 0                |            |          |
| Lauder02 (ll)           | 0                |            |          | 0                |            |          |
| Lauder03 (lr)           | 0                |            |          | 0                |            |          |
| Lamont (oc)             | 0                |            |          | 0                |            |          |
| Manaus (ma)             | 0                |            |          | 0                |            |          |
| Nicosia (ni)            | 0                |            |          | 0                |            |          |
| Ny-Alesund (ny)         | 0                |            |          | 0                |            |          |
| Park Falls (pa)         | 0                |            |          | 0                |            |          |
| Paris (pr)              | 0                |            |          | 0                |            |          |
| Reunion (ra)            | 0                |            |          | 0                |            |          |
| Rikubetsu (rj)          | 0                |            |          | 0                |            |          |
| Saga (js)               | 0                |            |          | 0                |            |          |
| Sodankyla (so)          | 0                |            |          | 0                |            |          |
| Tsukuba (tk)            | 0                |            |          | 0                |            |          |
| Xianghe (xh)            | 0                |            |          | 0                |            |          |
| Total                   | 1385             | -0.79      | 1.89     | 1385             | 8.13       | 19.17    |

**Table S3** Validation results for V02.90/91 over ocean with gain H

| V02.90/91 (Ocean/H)     | XCO <sub>2</sub> |            |          | XCH <sub>4</sub> |            |          |
|-------------------------|------------------|------------|----------|------------------|------------|----------|
| Site                    | N                | Bias (ppm) | SD (ppm) | N                | Bias (ppb) | SD (ppb) |
| Bremen (br)             | 1                | -0.19      | 0.00     | 1                | -1.87      | 0.00     |
| Burgos (bu)             | 39               | -1.52      | 2.56     | 39               | 3.99       | 15.07    |
| Caltech (Pasadena) (ci) | 0                |            |          | 0                |            |          |
| East Trout Lake (et)    | 0                |            |          | 0                |            |          |
| Fourcorners (fc)        | 0                |            |          | 0                |            |          |
| Indianapolis (if)       | 0                |            |          | 0                |            |          |
| Izana (iz)              | 0                |            |          | 0                |            |          |
| JPL01 (jc)              | 0                |            |          | 0                |            |          |
| JPL02 (jf)              | 0                |            |          | 0                |            |          |
| Karlsruhe (ka)          | 0                |            |          | 0                |            |          |
| Lauder01 (lh)           | 0                |            |          | 0                |            |          |
| Lauder02 (ll)           | 0                |            |          | 0                |            |          |
| Lauder03 (lr)           | 0                |            |          | 0                |            |          |
| Lamont (oc)             | 0                |            |          | 0                |            |          |
| Manaus (ma)             | 0                |            |          | 0                |            |          |
| Nicosia (ni)            | 9                | -2.74      | 2.62     | 9                | 5.78       | 18.26    |
| Ny-Alesund (ny)         | 0                |            |          | 0                |            |          |
| Park Falls (pa)         | 0                |            |          | 0                |            |          |
| Paris (pr)              | 0                |            |          | 0                |            |          |
| Reunion (ra)            | 9                | -3.62      | 1.34     | 9                | -4.40      | 7.91     |
| Rikubetsu (rj)          | 0                |            |          | 0                |            |          |
| Saga (js)               | 14               | -0.05      | 2.31     | 14               | 16.91      | 11.59    |
| Sodankyla (so)          | 0                |            |          | 0                |            |          |
| Tsukuba (tk)            | 0                |            |          | 0                |            |          |
| Xianghe( xh)            | 0                |            |          | 0                |            |          |
| Total                   | 72               | -1.63      | 2.62     | 72               | 5.60       | 15.43    |



**Table S4** Validation results for V03.00 over land with gain H

| V03.00 (Land/H)         | XCO <sub>2</sub> |            |          | XCH <sub>4</sub> |            |          |
|-------------------------|------------------|------------|----------|------------------|------------|----------|
| Site                    | N                | Bias (ppm) | SD (ppm) | N                | Bias (ppb) | SD (ppb) |
| Bremen (br)             | 54               | 0.33       | 2.37     | 54               | 2.60       | 11.55    |
| Burgos (bu)             | 77               | 1.27       | 2.36     | 77               | 2.02       | 7.89     |
| Caltech (Pasadena) (ci) | 2691             | -1.24      | 1.83     | 2691             | -7.09      | 10.49    |
| East Trout Lake (et)    | 4                | -1.38      | 1.74     | 4                | 1.52       | 8.67     |
| Fourcorners (fc)        | 12               | -0.97      | 1.24     | 12               | -4.63      | 8.78     |
| Indianapolis (if)       | 41               | -0.39      | 1.99     | 41               | -3.22      | 10.10    |
| Izana (iz)              | 0                |            |          | 0                |            |          |
| JPL01 (jc)              | 0                |            |          | 0                |            |          |
| JPL02 (jf)              | 907              | -0.81      | 1.93     | 907              | -6.46      | 11.71    |
| Karlsruhe (ka)          | 295              | 0.03       | 2.44     | 295              | -5.02      | 11.78    |
| Lauder01 (lh)           | 5                | -0.54      | 1.25     | 5                | 11.94      | 4.05     |
| Lauder02 (ll)           | 226              | -0.96      | 1.95     | 234              | -6.49      | 10.54    |
| Lauder03 (lr)           | 179              | -1.53      | 1.58     | 181              | -9.94      | 9.52     |
| Lamont (oc)             | 1618             | -1.06      | 1.82     | 1618             | -4.51      | 11.68    |
| Manaus (ma)             | 3                | 1.36       | 0.69     | 3                | -4.95      | 4.74     |
| Nicosia (ni)            | 0                |            |          | 0                |            |          |
| Ny-Alesund (ny)         | 0                |            |          | 0                |            |          |
| Park Falls (pa)         | 288              | -0.89      | 2.25     | 288              | 0.61       | 11.61    |
| Paris (pr)              | 321              | -0.86      | 2.10     | 321              | -7.23      | 11.47    |
| Reunion (ra)            | 0                |            |          | 0                |            |          |
| Rikubetsu (rj)          | 152              | -0.20      | 2.24     | 152              | 2.44       | 10.94    |
| Saga (js)               | 398              | 1.12       | 2.50     | 398              | 3.60       | 12.17    |
| Sodankyla (so)          | 59               | -0.17      | 2.01     | 59               | -2.75      | 9.99     |
| Tsukuba (tk)            | 1017             | 0.74       | 2.24     | 1017             | -0.83      | 11.15    |
| Xianghe (xh)            | 670              | 0.10       | 2.67     | 670              | 0.10       | 14.86    |
| Total                   | 8780             | -0.61      | 2.20     | 8790             | -4.23      | 11.97    |

**Table S5** Validation results for V03.00 over land with gain M

| V03.00 (Land/M)         | XCO <sub>2</sub> |            |          | XCH <sub>4</sub> |            |          |
|-------------------------|------------------|------------|----------|------------------|------------|----------|
|                         | N                | Bias (ppm) | SD (ppm) | N                | Bias (ppb) | SD (ppb) |
| Bremen (br)             | 0                |            |          | 0                |            |          |
| Burgos (bu)             | 0                |            |          | 0                |            |          |
| Caltech (Pasadena) (ci) | 1229             | -0.90      | 1.94     | 1229             | -0.11      | 19.01    |
| East Trout Lake (et)    | 0                |            |          | 0                |            |          |
| Fourcorners (fc)        | 0                |            |          | 0                |            |          |
| Indianapolis (if)       | 0                |            |          | 0                |            |          |
| Izana (iz)              | 0                |            |          | 0                |            |          |
| JPL01 (jc)              | 0                |            |          | 0                |            |          |
| JPL02 (jf)              | 166              | -0.94      | 2.18     | 166              | -1.90      | 21.23    |
| Karlsruhe (ka)          | 0                |            |          | 0                |            |          |
| Lauder01 (lh)           | 0                |            |          | 0                |            |          |
| Lauder02 (ll)           | 0                |            |          | 0                |            |          |
| Lauder03 (lr)           | 0                |            |          | 0                |            |          |
| Lamont (oc)             | 0                |            |          | 0                |            |          |
| Manaus (ma)             | 0                |            |          | 0                |            |          |
| Nicosia (ni)            | 0                |            |          | 0                |            |          |
| Ny-Alesund (ny)         | 0                |            |          | 0                |            |          |
| Park Falls (pa)         | 0                |            |          | 0                |            |          |
| Paris (pr)              | 0                |            |          | 0                |            |          |
| Reunion (ra)            | 0                |            |          | 0                |            |          |
| Rikubetsu (rj)          | 0                |            |          | 0                |            |          |
| Saga (js)               | 0                |            |          | 0                |            |          |
| Sodankyla (so)          | 0                |            |          | 0                |            |          |
| Tsukuba (tk)            | 0                |            |          | 0                |            |          |
| Xianghe (xh)            | 0                |            |          | 0                |            |          |
| Total                   | 1360             | -0.88      | 1.97     | 1360             | -0.19      | 19.29    |

**Table S6** Validation results for V03.00 over ocean with gain H

| V03.00 (Ocean/H)        | XCO <sub>2</sub> |            |          | XCH <sub>4</sub> |            |          |
|-------------------------|------------------|------------|----------|------------------|------------|----------|
| Site                    | N                | Bias (ppm) | SD (ppm) | N                | Bias (ppb) | SD (ppb) |
| Bremen (br)             | 1                | -7.68      | 0.00     | 1                | -16.87     | 0.00     |
| Burgos (bu)             | 33               | -7.80      | 3.00     | 33               | -9.03      | 13.04    |
| Caltech (Pasadena) (ci) | 0                |            |          | 0                |            |          |
| East Trout Lake (et)    | 0                |            |          | 0                |            |          |
| Fourcorners (fc)        | 0                |            |          | 0                |            |          |
| Indianapolis (if)       | 0                |            |          | 0                |            |          |
| Izana (iz)              | 0                |            |          | 0                |            |          |
| JPL01 (jc)              | 0                |            |          | 0                |            |          |
| JPL02 (jf)              | 0                |            |          | 0                |            |          |
| Karlsruhe (ka)          | 0                |            |          | 0                |            |          |
| Lauder01 (lh)           | 0                |            |          | 0                |            |          |
| Lauder02 (ll)           | 0                |            |          | 0                |            |          |
| Lauder03 (lr)           | 0                |            |          | 0                |            |          |
| Lamont (oc)             | 0                |            |          | 0                |            |          |
| Manaus (ma)             | 0                |            |          | 0                |            |          |
| Nicosia (ni)            | 10               | -8.05      | 2.89     | 10               | -3.72      | 16.25    |
| Ny-Alesund (ny)         | 0                |            |          | 0                |            |          |
| Park Falls (pa)         | 0                |            |          | 0                |            |          |
| Paris (pr)              | 0                |            |          | 0                |            |          |
| Reunion (ra)            | 7                | -10.36     | 1.69     | 7                | -14.14     | 9.83     |
| Rikubetsu (rj)          | 0                |            |          | 0                |            |          |
| Saga (js)               | 10               | -7.72      | 2.05     | 10               | -14.12     | 18.19    |
| Sodankyla (so)          | 0                |            |          | 0                |            |          |
| Tsukuba (tk)            | 0                |            |          | 0                |            |          |
| Xianghe (xh)            | 0                |            |          | 0                |            |          |
| Total                   | 61               | -8.12      | 2.81     | 61               | -9.71      | 14.60    |

The results of the stricter horizontal match-up condition ( $\pm 0.01^\circ$ ) are shown in Tables S7 and S8. The results are only shown for over land with gain H.

**Table S7:** Validation results of the stricter match-up condition for V02.90/91 over land with gain H

| V02.90/91 (Land/H)      | XCO <sub>2</sub> |            |          | XCH <sub>4</sub> |            |          |
|-------------------------|------------------|------------|----------|------------------|------------|----------|
| Site                    | N                | Bias (ppm) | SD (ppm) | N                | Bias (ppb) | SD (ppb) |
| Bremen (br)             | 0                |            |          | 0                |            |          |
| Burgos (bu)             | 20               | 2.54       | 1.79     | 20               | 20.11      | 5.88     |
| Caltech (Pasadena) (ci) | 878              | -0.27      | 1.67     | 878              | 5.16       | 9.67     |
| East Trout Lake (et)    | 0                |            |          | 0                |            |          |
| Fourcorners (fc)        | 0                |            |          | 0                |            |          |
| Indianapolis (if)       | 0                |            |          | 0                |            |          |
| Izana (iz)              | 0                |            |          | 0                |            |          |
| JPL01 (jc)              | 0                |            |          | 0                |            |          |
| JPL02 (jf)              | 229              | 0.59       | 1.52     | 229              | 8.61       | 8.77     |
| Karlsruhe (ka)          | 0                |            |          | 0                |            |          |
| Lauder01 (lh)           | 5                | -0.82      | 1.91     | 5                | 12.93      | 3.49     |
| Lauder02 (ll)           | 144              | -1.32      | 1.93     | 144              | 0.32       | 10.96    |
| Lauder03 (lr)           | 30               | -0.44      | 1.45     | 30               | 2.39       | 8.44     |
| Lamont (oc)             | 268              | -0.92      | 1.57     | 268              | 3.15       | 8.55     |
| Manaus (ma)             | 0                |            |          | 0                |            |          |
| Nicosia (ni)            | 0                |            |          | 0                |            |          |
| Ny-Alesund (ny)         | 0                |            |          | 0                |            |          |
| Park Falls (pa)         | 0                |            |          | 0                |            |          |
| Paris (pr)              | 14               | -0.59      | 1.64     | 14               | 1.58       | 7.15     |
| Reunion (ra)            | 0                |            |          | 0                |            |          |
| Rikubetsu (rj)          | 4                | -0.13      | 1.70     | 4                | 4.50       | 5.80     |
| Saga (js)               | 75               | 0.88       | 1.77     | 75               | 12.13      | 7.17     |
| Sodankyla (so)          | 19               | -0.63      | 2.09     | 20               | 4.09       | 12.96    |
| Tsukuba (tk)            | 141              | -0.01      | 1.66     | 141              | 2.41       | 9.54     |
| Xianghe (xh)            | 0                |            |          | 0                |            |          |
| Total                   | 1743             | -0.31      | 1.76     | 1744             | 4.81       | 9.81     |

**Table S8:** Same as Table S7 but for V03.00.

| V03.00 (Land/H)         | XCO <sub>2</sub> |            |          | XCH <sub>4</sub> |            |          |
|-------------------------|------------------|------------|----------|------------------|------------|----------|
| Site                    | N                | Bias (ppm) | SD (ppm) | N                | Bias (ppb) | SD (ppb) |
| Bremen (br)             | 1                | 3.39       |          | 1                | 1.93       |          |
| Burgos (bu)             | 57               | 2.33       | 1.56     | 57               | 4.80       | 6.03     |
| Caltech (Pasadena) (ci) | 1072             | -0.70      | 1.69     | 1072             | -4.66      | 9.48     |
| East Trout Lake (et)    | 0                |            |          | 0                |            |          |
| Fourcorners (fc)        | 0                |            |          | 0                |            |          |
| Indianapolis (if)       | 0                |            |          | 0                |            |          |
| Izana (iz)              | 0                |            |          | 0                |            |          |
| JPL01 (jc)              | 0                |            |          | 0                |            |          |
| JPL02 (jf)              | 289              | 0.03       | 1.61     | 289              | -1.86      | 9.28     |
| Karlsruhe (ka)          | 0                |            |          | 0                |            |          |
| Lauder01 (lh)           | 4                | -0.67      | 1.37     | 4                | 12.03      | 4.53     |
| Lauder02 (ll)           | 147              | -0.75      | 1.86     | 148              | -5.35      | 10.41    |
| Lauder03 (lr)           | 42               | 0.07       | 1.40     | 42               | -3.81      | 8.44     |
| Lamont (oc)             | 307              | -0.75      | 1.61     | 307              | -2.36      | 8.50     |
| Manaus (ma)             | 0                |            |          | 0                |            |          |
| Nicosia (ni)            | 0                |            |          | 0                |            |          |
| Ny-Alesund (ny)         | 0                |            |          | 0                |            |          |
| Park Falls (pa)         | 0                |            |          | 0                |            |          |
| Paris (pr)              | 18               | -0.71      | 1.40     | 18               | -6.58      | 7.66     |
| Reunion (ra)            | 0                |            |          | 0                |            |          |
| Rikubetsu (rj)          | 5                | 0.10       | 1.80     | 5                | 1.58       | 8.58     |
| Saga (js)               | 83               | 0.32       | 2.20     | 83               | 3.53       | 9.76     |
| Sodankyla (so)          | 23               | -0.22      | 2.05     | 23               | -3.51      | 11.82    |
| Tsukuba (tk)            | 170              | 0.29       | 1.83     | 170              | -1.64      | 10.56    |
| Xianghe (xh)            | 0                |            |          | 0                |            |          |
| Total                   | 2111             | -0.43      | 1.81     | 2112             | -3.30      | 9.68     |
